# Supplementary material
Source: publisher figshare collection journal article supplement (https://sage.figshare.com/ndownloader/files/13836086)
Supplement: Supplementary file 1 [file 13836086]

**Table 1 Supplement. Descriptive statistics**

| Variable                           | Mean   | Standard deviation | Min    | Max     | Data source |
|------------------------------------|--------|--------------------|--------|---------|-------------|
| Unfunded liability per capita (\$) | 490    | 632                | -2,865 | 4,803   | GFOA        |
| Property tax revenue (% own rev)   | 24.83  | 14.77              | 0.00   | 97.95   | USCB        |
| IG aid (% total)                   | 14.76  | 10.49              | 0.00   | 61.87   | USCB        |
| Total revenue per capita (\$)      | 2,282  | 1,309              | 330    | 8,102   | USCB        |
| General fund balance (%)           | 14.54  | 13.66              | -14.65 | 157.57  | GFOA        |
| Long-term debt per capita (\$)     | 2,813  | 2,186              | 0.00   | 17,279  | USCB        |
| Population over 65 (%)             | 9.92   | 3.76               | 2.46   | 34.91   | USCB - D    |
| Renter-occupied housing (%)        | 41.07  | 11.06              | 9.06   | 74.09   | USCB - D    |
| Median household income (\$)       | 54,104 | 17,892             | 24,355 | 125,775 | USCB - D    |
| Population (in 1000s)              | 180    | 309                | 50     | 3,844   | USCB - D    |
| Entry Age Normal method            | 0.74   | -                  | 0      | 1       | GFOA        |
| Number of municipal plans          | 0.71   | 0.94               | 0      | 3       | USCB - P    |

Note: number of city-year observations – 2692, number of cities – 401, values in dollars are rounded to the nearest dollar, values in percent are rounded to the second decimal. Data sources: **GFOA** – Government Finance Officers Association, **USCB** - U.S. Census Bureau, Annual Survey of Government Finances, **USCB – D** – U.S. Census Bureau, Decennial Census, **USCB – P** – U.S. Census Bureau, Survey of Public Retirement Systems.

**Table 2 Supplement. Sample compared to all U.S. cities with population over 50,000 in 2012**

|                                 | Sample (n=324) |          |      |       | All cities (N=707) |          |      |       | t-test |     |
|---------------------------------|----------------|----------|------|-------|--------------------|----------|------|-------|--------|-----|
|                                 | <b>Mean</b>    | St. dev. | Min  | Max   | <b>Mean</b>        | St. dev. | Min  | Max   |        |     |
| Property tax (% own rev)        | <b>25.37</b>   | 14.63    | 0.00 | 97.95 | <b>29.91</b>       | 18.18    | 0.00 | 97.95 | -4.27  | *** |
| IG revenue (% total)            | <b>13.82</b>   | 10.02    | 0.36 | 49.14 | <b>17.61</b>       | 13.21    | 0.36 | 77.89 | -5.07  | *** |
| Total revenue/capita (\$1000s)  | <b>2.151</b>   | 1.26     | 0.66 | 7.633 | <b>2.22</b>        | 1.63     | 0.09 | 19.33 | -0.74  |     |
| Long-term debt/capita (\$1000s) | <b>2.75</b>    | 2.23     | 0.04 | 17.73 | <b>2.58</b>        | 2.41     | 0.00 | 19.54 | 1.11   |     |
| Population (1000s)              | <b>172</b>     | 296      | 50   | 3792  | <b>162</b>         | 390      | 50   | 8175  | 0.45   |     |

Note: The sample includes 45.8 % of all U.S. cities in 2012. The variables for comparison are drawn from the U.S. Census Bureau's 2012 Census of Local Government Finances.
